# Supplementary material for: A Fully Integrated In Vitro Diagnostic Microsystem for Pathogen Detection Developed Using a “3D Extensible” Microfluidic Design Paradigm
Source: MDPI journal article supplement (doi:10.3390/mi10120873), 2019-12-12
Supplement: s1 [file s1]

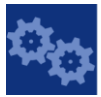

# Supplementary Materials: A fully Integrated in vitro Diagnostic Microsystem for Pathogen Detection Developed Using a “3D Extensible” Microfluidic Design Paradigm

Zhi Geng <sup>1</sup>, Yin Gu <sup>1,2</sup>, Shanglin Li <sup>1,2</sup>, Baobao Lin <sup>1</sup> and Peng Liu <sup>1,\*</sup>

<sup>1</sup> Department of Biomedical Engineering, School of Medicine, Tsinghua University, Beijing 100084, China; gengz15@mails.tsinghua.edu.cn (Z.G.); y-gu13@tsinghua.org.cn (Y.G.); li-sl14@tsinghua.org.cn (S.L.); lbb17@mails.tsinghua.edu.cn (B.L.)

<sup>2</sup> FengteBio Corporation, Beijing 100079, China;

\* Correspondence: pliu@tsinghua.edu.cn; Tel.: +86-10-6279-8732

Received: 25 November 2019; Accepted: 10 December 2019; Published: date

**Table S1.** Primers and ordered sequences (5' to 3').

| Primer Species             | Ordered Sequences                                                                                                                                                                                                                                                                                                                                                                                                                                                                                                                                                                                                                                                                                                                                                                                         |
|----------------------------|-----------------------------------------------------------------------------------------------------------------------------------------------------------------------------------------------------------------------------------------------------------------------------------------------------------------------------------------------------------------------------------------------------------------------------------------------------------------------------------------------------------------------------------------------------------------------------------------------------------------------------------------------------------------------------------------------------------------------------------------------------------------------------------------------------------|
| λ-DNA, PCR forward primer  | CAAGCTTTGCCACACCACGGTATT                                                                                                                                                                                                                                                                                                                                                                                                                                                                                                                                                                                                                                                                                                                                                                                  |
| λ-DNA, PCR reverse primer  | TAAGCACGAACTCAGCCAGAACGA                                                                                                                                                                                                                                                                                                                                                                                                                                                                                                                                                                                                                                                                                                                                                                                  |
| CT, LAMP inner primer, FIP | ACGTCTTTGTTTCTAGATGAAGGAAAGTATGTGGAATGT<br>CGAACT                                                                                                                                                                                                                                                                                                                                                                                                                                                                                                                                                                                                                                                                                                                                                         |
| CT, LAMP inner primer, BIP | AGTCTGATTCAGAGAAGAATCGCCGGAACACATGATGC<br>GAAGT                                                                                                                                                                                                                                                                                                                                                                                                                                                                                                                                                                                                                                                                                                                                                           |
| CT, LAMP outer primer, F3  | GGCGATTAAAAACCAAGGTC                                                                                                                                                                                                                                                                                                                                                                                                                                                                                                                                                                                                                                                                                                                                                                                      |
| CT, LAMP outer primer, B3  | AGGAGGACAAAGAACTCC                                                                                                                                                                                                                                                                                                                                                                                                                                                                                                                                                                                                                                                                                                                                                                                        |
| CT, LAMP loop primer, LF   | CCAACACCCTTATCGCCGA                                                                                                                                                                                                                                                                                                                                                                                                                                                                                                                                                                                                                                                                                                                                                                                       |
| CT plasmid sequence        | TCTCAGCAACTTTGAATTCTGAGGAAAGTCAGAGTTTG<br>GATCAATTATTTTATCAGAGTCCCAAACTATTCGGAT<br>GAAGAATTTTATCAAGAAGACATCCTAGCGGTAAAAC<br>GCTTACTGGTCAGATAAAATCCATACAGAAGCAACACG<br>TACTTCTTTTAGGAGAAAAAATCTATAATGCTAGAAAA<br>TCCTGAGTAAGGATCACTTCTCCTCAACAACCTTTTCAT<br>CTTGGATAGAGTTAGTTTTTAGAACTAAGTCTTCTGCTTA<br>CAATGCTCTTGCATATTACGAGCTTTTATAAACCTCCCC<br>AACCAAACTCTACAAAAAGAGTTTCAATCGATCCCCTA<br>TAAATCCGCATATATTTTGGCCGCTAGAAAAGGCGATTT<br>AAAAACCAAGGTCGATGTGATAGGGAAGTATGTGGA<br>ATGTCGAACTCATCGGCGATAAGGGTGTGGATCAATTT<br>CTTCCTTCATCTAGAAACAAAGACGTTAGAGAAACGAT<br>AGATAAGTCTGATTCAGAGAAGAATCGCCAATTATCTG<br>ATTTCTTAATAGAGATACTTCGCATCATGTGTTCCGGAGT<br>TTCTTTGTCTCCTATAACGAAAATCTTCTACAACAGCTT<br>TTTGAACCTTTTAAGCAAAAGAGCTGATCCTCCGTCAGC<br>TCATATATATATCTATTATATATATATATTTAGGGATTTGAT<br>TTTACGAGAGAG |

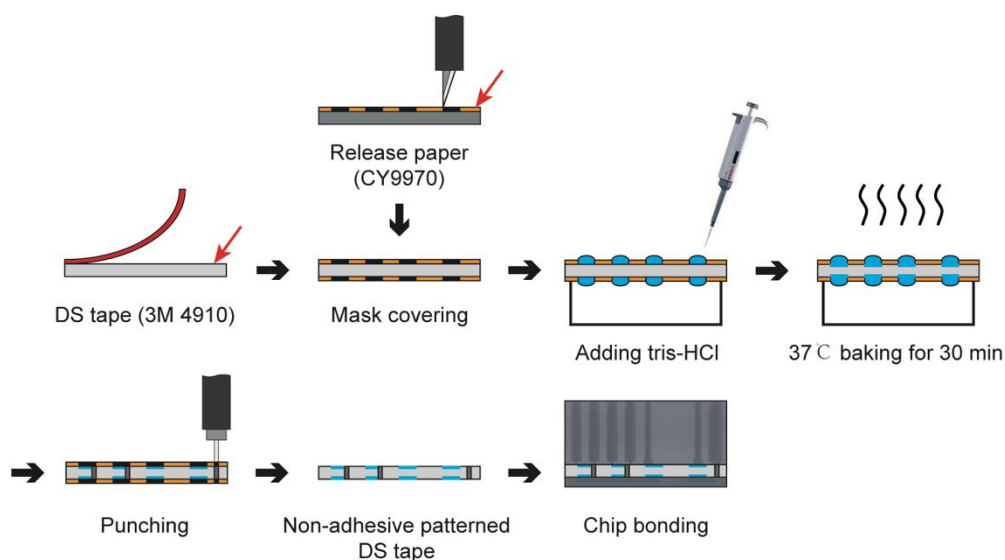

**Figure S1.** Patterning procedure of the tape. The double-sided adhesive (DS) tape (3M 4910) was covered on both sides by patterned release paper. Then, tris-HCl was pipetted onto the exposed surfaces of the tape followed by incubation at 37 °C for 30 min for removing the adhesiveness. After the holes for check valves were punched and the masks were peeled off, the patterned DS tape was employed for device bonding.

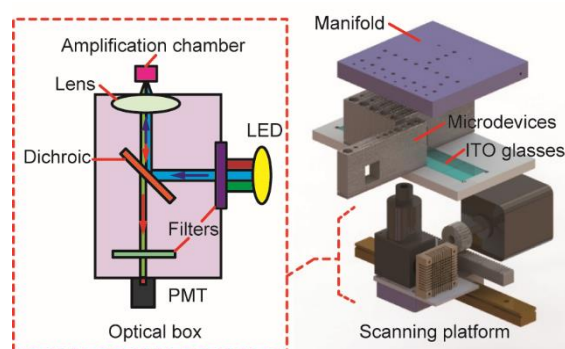

**Figure S2.** Core structure of the iLAMP instrument. The amplification chambers of iLAMP microdevices were heated by ITO glasses and a connection manifold served as the adapter between microdevices and air pumps. An optical box containing a PMT, a LED, lens, and filters, was driven by a stepping motor to scan the fluorescence of the amplification chambers.

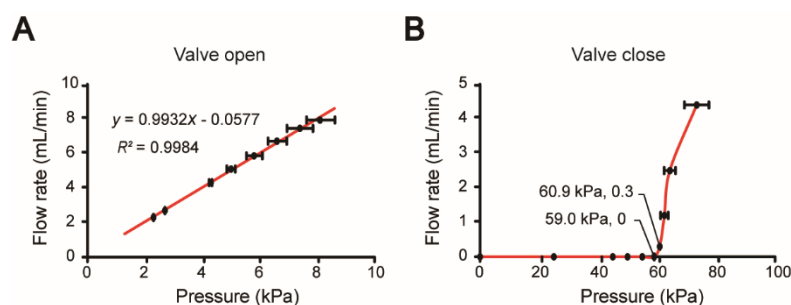

**Figure S3.** Quantitative characterization of the pneumatic microvalves. The inlet of the device in Figure 2C was connected via PTFE tubing to a 50-mL syringe filled with water and installed on a syringe pump and a manometer was also connected to the syringe via a Y-adaptor to measure the pressure. For measuring the flow rate, the outlet of the chip was connected via PTFE tubing to a flowmeter and a water tank in the end. **(A)** When the on-off valve (v2) was open, the flow rate was proportional to the working pressure and the coefficient reflected the flow resistance (mean  $\pm$  SD,  $n = 3$ ). **(B)** When a pressure ( $P_v = 5.9$  psi) was applied to the valve (v2) using a rotary vane pump, the valve (v2) could be properly closed as long as the pressure ( $P_o$ ) below 59.0 kPa. After the pressure ( $P_o$ ) raised above this value, the liquid could be pushed through the pneumatic seal (mean  $\pm$  SD,  $n = 3$ ).

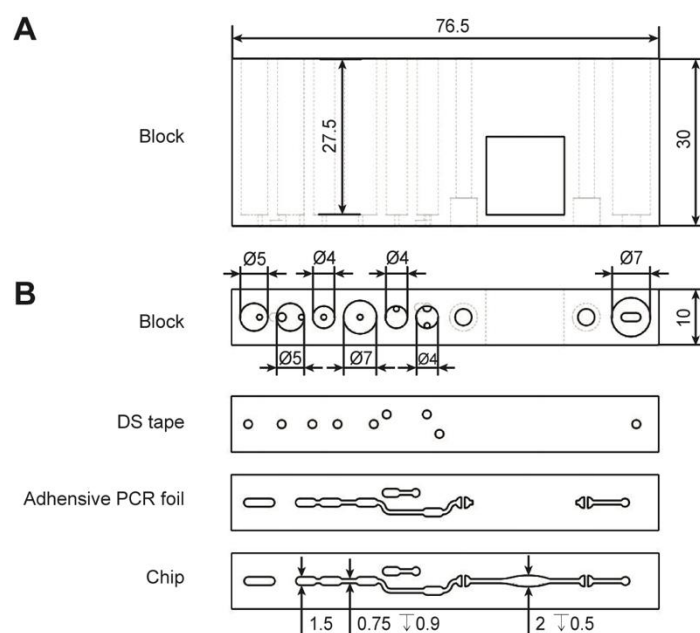

**Figure S4.** Drawings of the iLAMP microdevice. All the dimensions are shown in millimeters. **(A)** Side view of the block. The cavity above the amplification chamber is used for thermal insulation, leading to an increased heating rate. **(B)** Top views of different components of the iLAMP microdevice.

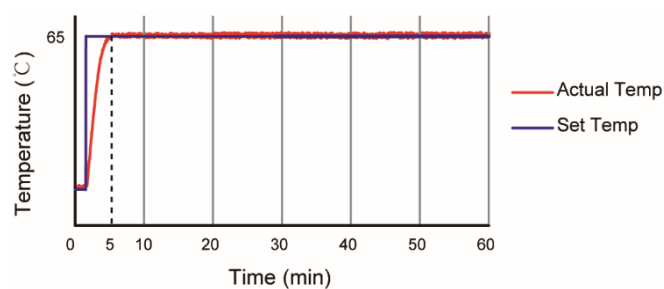

**Figure S5.** Temperature calibration of the iLAMP instrument. The set temperature (**blue**) was calibrated according to the actual temperature in the amplification chamber of the iLAMP microdevice (**red**). The chamber was heated to 65 °C in 5 min and maintained for 60 min.

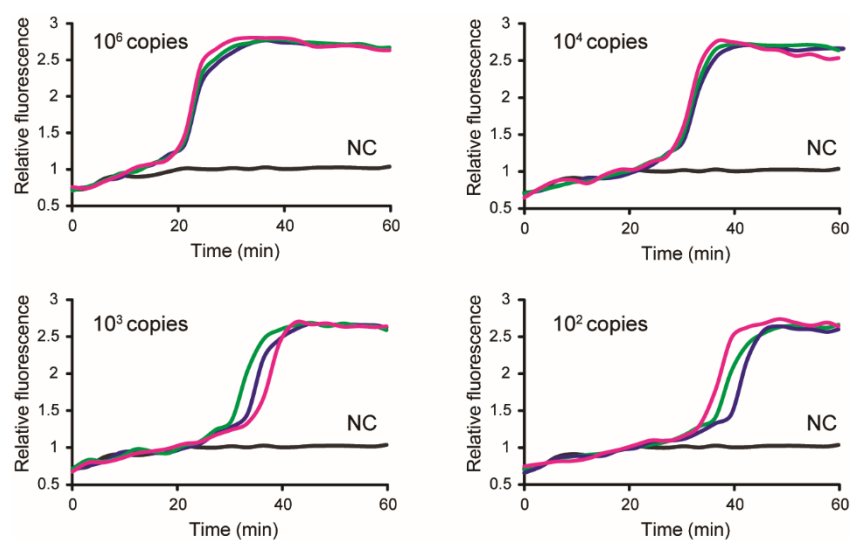

**Figure S6.** Validation of on-chip amplifications of  $10^6$ ,  $10^4$ ,  $10^3$ , and  $10^2$  copies of templates. The fluorescence graphs showed that the positive groups had steep signal rises from the baseline. The experiments in each group were repeated three times.
